# Supplementary material for: Structure, sequon recognition and mechanism of tryptophan C-mannosyltransferase
Source: PubMed Central journal article supplement (PMC10154233; doi:10.1038/s41589-022-01219-9), 2023-01-05

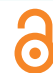

# Structure, sequon recognition and mechanism of tryptophan C-mannosyltransferase

In the format provided by the authors and unedited

## Supplementary Information

### Structure, sequon recognition, and mechanism of tryptophan C-mannosyltransferase

Joël S. Bloch<sup>1,7</sup>, Alan John<sup>2,3</sup>, Runyu Mao<sup>2,3</sup>, Somnath Mukherjee<sup>4</sup>, Jérémy Boilevin<sup>5</sup>, Rossitza N. Irobalieva<sup>1</sup>, Tamis Darbre<sup>5</sup>, Nichollas E. Scott<sup>6</sup>, Jean-Louis Reymond<sup>5</sup>, Anthony A. Kossiakoff<sup>4</sup>, Ethan D. Goddard-Borger<sup>2,3\*</sup>, Kaspar P. Locher<sup>1\*</sup>

<sup>1</sup>Institute of Molecular Biology and Biophysics, ETH Zürich, Otto-Stern-Weg 5, 8093 Zürich, Switzerland.

<sup>2</sup>The Walter and Eliza Hall Institute of Medical Research, Parkville, Victoria 3052, Australia.

<sup>3</sup>Department of Medical Biology, University of Melbourne, Parkville, Victoria 3052, Australia.

<sup>4</sup>Department of Biochemistry and Molecular Biology, University of Chicago, 900 East 57th Street, Chicago, IL 60637, USA.

<sup>5</sup>Department of Chemistry, Biochemistry and Pharmaceutical Sciences, University of Bern, Freiestrasse 3, 3012 Bern, Switzerland.

<sup>6</sup>Department of Microbiology and Immunology, University of Melbourne at the Peter Doherty Institute for Infection and Immunity, Parkville, Victoria 3010, Australia.

<sup>7</sup>Present address: Laboratory of Molecular Neurobiology and Biophysics and Howard Hughes Medical Institute, The Rockefeller University, 1230 York Avenue, New York, NY 10065, USA.

\*Correspondence: [goddard-borger.e@wehi.edu.au](mailto:goddard-borger.e@wehi.edu.au) (E.D.G.-B.), [locher@mol.biol.ethz.ch](mailto:locher@mol.biol.ethz.ch) (K.P.L.)

**Supplementary Figures:**

Supplementary Figure 1: Map quality of *CeDPY19* apo structure.

Supplementary Figure 2: Western blot analysis of *CeDPY19* mutant expression for in vivo glycosylation assays.

**Supplementary Tables:**

Supplementary Table 1: Cryo-EM data collection, refinement, and validation statistics.

Supplementary Table 2: Oligonucleotide primer sequences used in this study. (Also provided as separate Spreadsheet)

Supplementary Table 3: Oligonucleotide pairs used to mutagenize pGAPZ-*CeDPY19*.

**Supplementary Note:**

Synthesis of Dol-C-P-Man.

LC-MS analysis of glycopeptides.

Analytical chemistry and chemical compounds.

Source Data for Supplementary Figure 2.

## Supplementary Figures

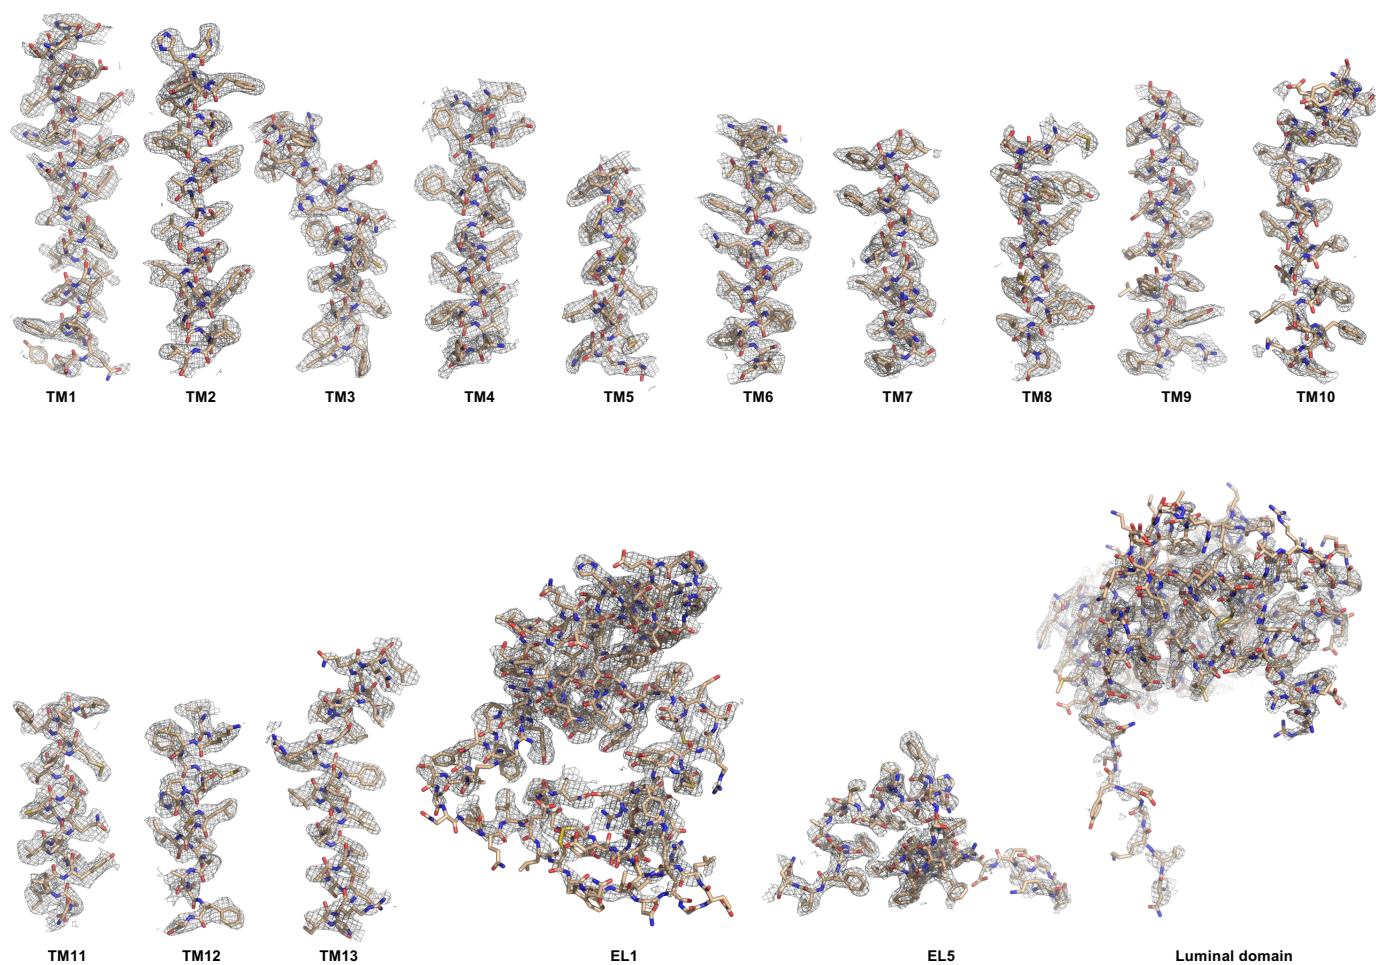

**Supplementary Figure 1 | Map quality of *CeDPY19* apo structure.** *CeDPY19* is depicted in stick representation. Maps are displayed at a contour level of 8.0 r.m.s.d. and were carved at 2.2 Å.

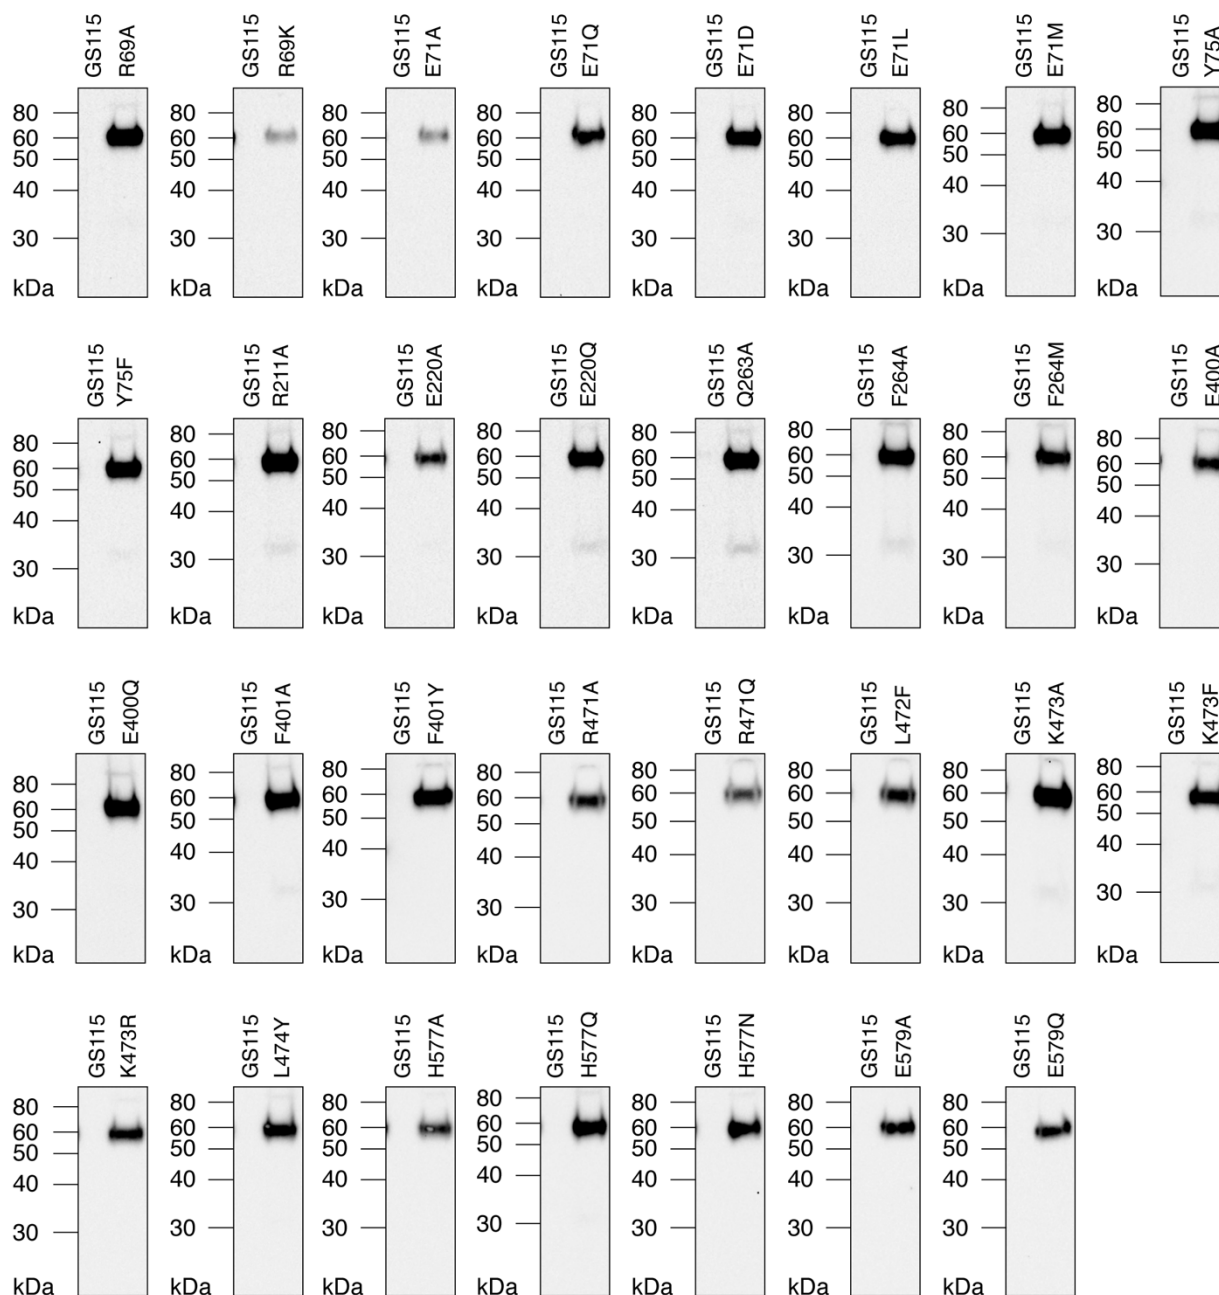

**Supplementary Figure 2 | Western blot analysis of *CeDPY19* mutant expression for in vivo glycosylation assays.** C-terminally FLAG3-tagged *CeDPY19* mutants were expressed in *P. pastoris* and the corresponding expression levels were assessed by Western-Blot analysis of the lysates using an M2 anti-FLAG mouse IgG1 (1:5000, SigmaAldrich, F3165) as the primary antibody and goat anti-mouse horseradish peroxidase conjugate (1:10000, ThermoFisher, 62-6520) as the secondary antibody.

**Supplementary Tables:**

**Supplementary Table 1 | Cryo-EM data collection, refinement, and validation statistics.**

|                                                  | #1 CeDPY19–<br>CMT2-Fab–<br>anti-Fab Nb<br>apo structure<br><br>(EMDB-14780)<br>(PDB ID 7ZLH) | #2 CeDPY19–<br>CMT2-Fab–<br>anti-Fab Nb<br>+ acceptor peptide<br><br>(EMDB-14779)<br>(PDB ID 7ZLG) | #3 CeDPY19–<br>CMT2-Fab–<br>anti-Fab Nb<br>+ Dol25-P-Man<br><br>(EMDB-14781)<br>(PDB ID 7ZLI) | #4 CeDPY19–<br>CMT2-Fab–<br>anti-Fab Nb<br>+ acceptor peptide<br>+ Dol25-P-C-Man<br><br>(EMDB-14782)<br>(PDB ID 7ZLJ) |
|--------------------------------------------------|-----------------------------------------------------------------------------------------------|----------------------------------------------------------------------------------------------------|-----------------------------------------------------------------------------------------------|-----------------------------------------------------------------------------------------------------------------------|
| <b>Data collection and processing</b>            |                                                                                               |                                                                                                    |                                                                                               |                                                                                                                       |
| Magnification                                    | 130,000                                                                                       | 130,000                                                                                            | 130,000                                                                                       | 130,000                                                                                                               |
| Voltage (kV)                                     | 300                                                                                           | 300                                                                                                | 300                                                                                           | 300                                                                                                                   |
| Electron exposure per frame (e–/Å <sup>2</sup> ) | 1.21                                                                                          | 1.21                                                                                               | 1.21                                                                                          | 1.21                                                                                                                  |
| Defocus range (µm)                               | -0.6 to -0.8                                                                                  | -0.6 to -0.8                                                                                       | -0.6 to -0.8                                                                                  | -0.6 to -0.8                                                                                                          |
| Pixel size (Å)                                   | 0.66                                                                                          | 0.66                                                                                               | 0.66                                                                                          | 0.66                                                                                                                  |
| Symmetry imposed                                 | C1                                                                                            | C1                                                                                                 | C1                                                                                            | C1                                                                                                                    |
| Initial particle images (no.)                    | 8,937,261                                                                                     | 3,876,382                                                                                          | 2,543,900                                                                                     | 4,309,649                                                                                                             |
| Final particle images (no.)                      | 384,830                                                                                       | 324,852                                                                                            | 301,020                                                                                       | 57,289                                                                                                                |
| Map resolution (Å)                               | 2.75                                                                                          | 2.72                                                                                               | 2.99                                                                                          | 3.63                                                                                                                  |
| FSC threshold                                    | 0.143                                                                                         | 0.143                                                                                              | 0.143                                                                                         | 0.143                                                                                                                 |
| Map resolution range (Å)                         | 2.70-3.20                                                                                     | 2.65-3.15                                                                                          | 2.95-3.45                                                                                     | 3.50-4.10                                                                                                             |
| <b>Refinement</b>                                |                                                                                               |                                                                                                    |                                                                                               |                                                                                                                       |
| Initial model used (PDB code)                    | 6ANI (Fab+Nb)                                                                                 | 6ANI (Fab+Nb)                                                                                      | 6ANI (Fab+Nb)                                                                                 | 6ANI (Fab+Nb)                                                                                                         |
| Model resolution (Å)                             | 2.44                                                                                          | 2.30                                                                                               | 2.94                                                                                          | 3.58                                                                                                                  |
| FSC threshold                                    | 0.143                                                                                         | 0.143                                                                                              | 0.143                                                                                         | 0.143                                                                                                                 |
| Model resolution range (Å)                       | 2.44-2.59                                                                                     | 2.30-2.30                                                                                          | 2.94-2.99                                                                                     | 3.65-3.86                                                                                                             |
| Map sharpening <i>B</i> factor (Å <sup>2</sup> ) | -89.7                                                                                         | -82.7                                                                                              | -120.7                                                                                        | -107.1                                                                                                                |
| Model composition                                |                                                                                               |                                                                                                    |                                                                                               |                                                                                                                       |
| Non-hydrogen atoms                               | 9480                                                                                          | 9618                                                                                               | 9636                                                                                          | 9715                                                                                                                  |
| Protein residues                                 | 1211                                                                                          | 1226                                                                                               | 1218                                                                                          | 1226                                                                                                                  |
| Ligands                                          | 0                                                                                             | 0 (ligand = peptide)                                                                               | 1                                                                                             | 1 (1 ligand = peptide)                                                                                                |
| <i>B</i> factors (Å <sup>2</sup> )               |                                                                                               |                                                                                                    |                                                                                               |                                                                                                                       |
| Protein                                          | 89.93                                                                                         | 109.82                                                                                             | 63.87                                                                                         | 51.52                                                                                                                 |
| Ligand                                           | n/a                                                                                           | n/a                                                                                                | 42.22                                                                                         | 19.95                                                                                                                 |
| R.m.s. deviations                                |                                                                                               |                                                                                                    |                                                                                               |                                                                                                                       |
| Bond lengths (Å)                                 | 0.004                                                                                         | 0.004                                                                                              | 0.007                                                                                         | 0.005                                                                                                                 |
| Bond angles (°)                                  | 0.807                                                                                         | 0.716                                                                                              | 0.970                                                                                         | 0.787                                                                                                                 |
| Validation                                       |                                                                                               |                                                                                                    |                                                                                               |                                                                                                                       |
| MolProbity score                                 | 1.90                                                                                          | 1.72                                                                                               | 2.37                                                                                          | 2.32                                                                                                                  |
| Clashscore                                       | 9.46                                                                                          | 7.08                                                                                               | 27.21                                                                                         | 31.81                                                                                                                 |
| Poor rotamers (%)                                | 0.38                                                                                          | 0.66                                                                                               | 0.96                                                                                          | 0.00                                                                                                                  |
| Ramachandran plot                                |                                                                                               |                                                                                                    |                                                                                               |                                                                                                                       |
| Favored (%)                                      | 93.99                                                                                         | 95.23                                                                                              | 93.05                                                                                         | 95.15                                                                                                                 |
| Allowed (%)                                      | 5.67                                                                                          | 4.36                                                                                               | 6.54                                                                                          | 4.77                                                                                                                  |
| Disallowed (%)                                   | 0.33                                                                                          | 0.41                                                                                               | 0.41                                                                                          | 0.08                                                                                                                  |

**Supplementary Table 2 | Oligonucleotide primer sequences used in this study.**

| primer | sequence                                                    |
|--------|-------------------------------------------------------------|
| DPY001 | GTCCTGGACCGCGCTGATGAACAGGGTCACGTC                           |
| DPY002 | GACGTGACCCTGTTTCATCAGCGCGGTCCAGGAC                          |
| DPY003 | CTTCGAAAGAGAGATGGCTTACGCAACTGAGATGGGTTTGTACTA<br>CTC        |
| DPY004 | CTTCGAAAGAGAGATGGCTTACAAAAGTGGGTTTGTACTA<br>CTC             |
| DPY005 | CGAAAGAGAGATGGCTTACAGAGCTGAGATGGGTTTGTACTACTC<br>CTACTAC    |
| DPY006 | CGAAAGAGAGATGGCTTACAGAGGTGAGATGGGTTTGTACTACTC<br>CTACTAC    |
| DPY007 | GAAAGAGAGATGGCTTACAGAACTGCGATGGGTTTGTACTACTCC<br>TACTAC     |
| DPY008 | GAAAGAGAGATGGCTTACAGAACTCAGATGGGTTTGTACTACTCC<br>TACTAC     |
| DPY009 | GAAAGAGAGATGGCTTACAGAACTGACATGGGTTTGTACTACTCC<br>TACTAC     |
| DPY010 | GAAAGAGAGATGGCTTACAGAACTCTGATGGGTTTGTACTACTCCT<br>ACTAC     |
| DPY011 | GAAAGAGAGATGGCTTACAGAACTATGATGGGTTTGTACTACTCCT<br>ACTAC     |
| DPY012 | GCTTACAGAACTGAGATGGGTTTGTACTACTCCTACTACAAGACTA<br>TCATCAACG |
| DPY013 | GCTTACAGAACTGAGATGGGTTTGTCTACTCCTACTACAAGACTA<br>TCATCAACG  |
| DPY014 | CAACCACGGTGAGGCTACTGCGGTTCAATGGACTCCACCATTG                 |
| DPY015 | CAATGGACTCCACCATTGAGAGCGTCCTTCGCTTTCCCATTCATC               |
| DPY016 | CAATGGACTCCACCATTGAGACAGTCCTTCGCTTTCCCATTCATC               |
| DPY017 | GTTCCAGCTTTGTTGTTCTGGGCGTTCACTCAGTTCGCTTTCTTC               |
| DPY018 | CAGCTTTGTTGTTCTGGCAGGCCACTCAGTTCGCTTTCTTCAC                 |
| DPY019 | CAGCTTTGTTGTTCTGGCAGATGACTCAGTTCGCTTTCTTCAC                 |
| DPY020 | CCTTCGCTAACTTCCACACTAGATTGGCCACTTGTTCCGCTGAGTTC<br>GAC      |



|        |                                                                |
|--------|----------------------------------------------------------------|
| DPY021 | CCTTCGCTAACTTCCACACTAGATTGTTCACTTGTTCCGCTGAGTTC<br>GAC         |
| DPY022 | CTAGATTGTACACTTGTTCCGCTGCGTTCGACTTCATCCAGTACTCC                |
| DPY023 | CTAGATTGTACACTTGTTCCGCTCAGTTCGACTTCATCCAGTACTCC                |
| DPY024 | GTACACTTGTTCCGCTGAGGCCGACTTCATCCAGTACTCCACTATC<br>G            |
| DPY025 | GTACACTTGTTCCGCTGAGTACGACTTCATCCAGTACTCCACTATC<br>G            |
| DPY026 | CCACTGTTATGGCTTTTTTGTATCATGGCGTTGAAGTTGTTTCATGACT<br>CC        |
| DPY027 | CCACTGTTATGGCTTTTTTGTATCATGCAATTGAAGTTGTTTCATGACT<br>CCACACTTG |
| DPY028 | CCACTGTTATGGCTTTTTTGTATCATGAAATTGAAGTTGTTTCATGACT<br>CCACACTTG |
| DPY029 | GTTATGGCTTTTTTGTATCATGAGATTCAAGTTGTTTCATGACTCCACA<br>C         |
| DPY030 | GTTATGGCTTTTTTGTATCATGAGATTGGCGTTGTTTCATGACTCCACA<br>CTTG      |
| DPY031 | GTTATGGCTTTTTTGTATCATGAGATTGACGTTGTTTCATGACTCCACA<br>CTTG      |
| DPY032 | GTTATGGCTTTTTTGTATCATGAGATTGAGGTTGTTTCATGACTCCAC<br>ACTTG      |
| DPY033 | GCTTTTTTGTATCATGAGATTGAAGTACTTCATGACTCCACACTTGT<br>G           |
| DPY034 | GACCAATCGTTAACCACCCTGCCTACGAACACGTTGGTATCAGAG                  |
| DPY035 | GACCAATCGTTAACCACCCTCAGTACGAACACGTTGGTATCAGAG                  |
| DPY036 | GACCAATCGTTAACCACCCTAACTACGAACACGTTGGTATCAGAG                  |
| DPY037 | GACCAATCGTTAACCACCCTCACTACGCACACGTTGGTATCAGAGA<br>GAGAACTTTG   |
| DPY038 | GACCAATCGTTAACCACCCTCACTACCAACACGTTGGTATCAGAGA<br>GAGAACTTTG   |
| DPY039 | GAGTAGTACAAACCCATCTCAGTTGCGTAAGCCATCTCTCTTTTCGA<br>AG          |

|        |                                                             |
|--------|-------------------------------------------------------------|
| DPY040 | GAGTAGTACAAACCCATCTCAGTTTTGTAAGCCATCTCTCTTTTCGA<br>AG       |
| DPY041 | GTAGTAGGAGTAGTACAAACCCATCTCAGCTCTGTAAGCCATCTCT<br>CTTTTCG   |
| DPY042 | GTAGTAGGAGTAGTACAAACCCATCTCACCTCTGTAAGCCATCTCT<br>CTTTTCG   |
| DPY043 | GTAGTAGGAGTAGTACAAACCCATCGCAGTTCTGTAAGCCATCTCT<br>CTTTC     |
| DPY044 | GTAGTAGGAGTAGTACAAACCCATCTGAGTTCTGTAAGCCATCTCT<br>CTTTC     |
| DPY045 | GTAGTAGGAGTAGTACAAACCCATGTCAGTTCTGTAAGCCATCTCT<br>CTTTC     |
| DPY046 | GTAGTAGGAGTAGTACAAACCCATCAGAGTTCTGTAAGCCATCTCT<br>CTTTC     |
| DPY047 | GTAGTAGGAGTAGTACAAACCCATCATAGTTCTGTAAGCCATCTCT<br>CTTTC     |
| DPY048 | CGTTGATGATAGTCTTGTAGTAGGAGTAGTACAAACCCATCTCAGT<br>TCTGTAAGC |
| DPY049 | CGTTGATGATAGTCTTGTAGTAGGAGTAGAACAACCCATCTCAGT<br>TCTGTAAGC  |
| DPY050 | CAATGGTGGAGTCCATTGAACCGCAGTAGCCTCACCGTGGTTG                 |
| DPY051 | GATGAATGGGAAAGCGAAGGACGCTCTCAATGGTGGAGTCCATTG               |
| DPY052 | GATGAATGGGAAAGCGAAGGACTGTCTCAATGGTGGAGTCCATTG               |
| DPY053 | GAAGAAAGCGAACTGAGTGAACGCCAGAACAACAAGCTGGAA<br>C             |
| DPY054 | GTGAAGAAAGCGAACTGAGTGGCCTGCCAGAACAACAAGCTG                  |
| DPY055 | GTGAAGAAAGCGAACTGAGTCATCTGCCAGAACAACAAGCTG                  |
| DPY056 | GTCGAACTCAGCGGAACAAGTGGCCAATCTAGTGTGGAAGTTAGC<br>GAAGG      |
| DPY057 | GTCGAACTCAGCGGAACAAGTGAACAATCTAGTGTGGAAGTTAGC<br>GAAGG      |
| DPY058 | GGAGTACTGGATGAAGTCGAACGCAGCGGAACAAGTGTACAATCT<br>AG         |

|        |                                                               |
|--------|---------------------------------------------------------------|
| DPY059 | GGAGTACTGGATGAAGTCGAACTGAGCGGAACAAGTGTACAATCT<br>AG           |
| DPY060 | CGATAGTGGAGTACTGGATGAAGTCGGCCTCAGCGGAACAAGTGT<br>AC           |
| DPY061 | CGATAGTGGAGTACTGGATGAAGTCGTACTIONCAGCGGAACAAGTGT<br>AC        |
| DPY062 | GGAGTCATGAACAACCTCAACGCCATGATCAAAAAAGCCATAACA<br>GTGG         |
| DPY063 | CAAGTGTGGAGTCATGAACAACCTCAATTGCATGATCAAAAAAGC<br>CATAACAGTGG  |
| DPY064 | CAAGTGTGGAGTCATGAACAACCTCAATTTTCATGATCAAAAAAGC<br>CATAACAGTGG |
| DPY065 | GTGTGGAGTCATGAACAACCTGAATCTCATGATCAAAAAAGCCAT<br>AAC          |
| DPY066 | CAAGTGTGGAGTCATGAACAACGCCAATCTCATGATCAAAAAAGC<br>CATAAC       |
| DPY067 | CAAGTGTGGAGTCATGAACAACGTCAATCTCATGATCAAAAAAGC<br>CATAAC       |
| DPY068 | CAAGTGTGGAGTCATGAACAACCTCAATCTCATGATCAAAAAAGC<br>CATAAC       |
| DPY069 | CACAAGTGTGGAGTCATGAAGTACTTCAATCTCATGATCAAAAAA<br>GC           |
| DPY070 | CTCTGATACCAACGTGTTTCGTAGGCAGGGTGGTTAACGATTGGTC                |
| DPY071 | CTCTGATACCAACGTGTTTCGTACTIONGAGGGTGGTTAACGATTGGTC             |
| DPY072 | CTCTGATACCAACGTGTTTCGTAGTTAGGGTGGTTAACGATTGGTC                |
| DPY073 | CAAAGTTCTCTCTCTGATACCAACGTGTGCGTAGTGAGGGTGGTTA<br>ACGATTGGTC  |
| DPY074 | CAAAGTTCTCTCTCTGATACCAACGTGTTGGTAGTGAGGGTGGTTA<br>ACGATTGGTC  |
| DPY075 | GATTTTGGTCATGAGATCAG                                          |
| DPY076 | TCTGGAATAACCTTACCG                                            |
| DPY077 | GATCTCAAGAAGATCCTTTGATC                                       |
| DPY078 | CCATTCATCATCGGTCACATTG                                        |
| DPY079 | CTTAAAATTGCCCTTTCAC                                           |

|        |                     |
|--------|---------------------|
| DPY080 | CAATACCCTCACAGGATTC |
|--------|---------------------|

**Supplementary Table 3 Oligonucleotide pairs used to mutagenize pGAPZ-CeDPY19.**

| CeDPY19 mutant | primer pair 1   | primer pair 2   |
|----------------|-----------------|-----------------|
| R69A           | DPY001 + DPY003 | DPY002 + DPY039 |
| R69K           | DPY001 + DPY004 | DPY002 + DPY040 |
| T70A           | DPY001 + DPY005 | DPY002 + DPY041 |
| T70V           | DPY001 + DPY006 | DPY002 + DPY042 |
| E71A           | DPY001 + DPY007 | DPY002 + DPY043 |
| E71Q           | DPY001 + DPY008 | DPY002 + DPY044 |
| E71D           | DPY001 + DPY009 | DPY002 + DPY045 |
| E71L           | DPY001 + DPY010 | DPY002 + DPY046 |
| E71M           | DPY001 + DPY011 | DPY002 + DPY047 |
| Y75A           | DPY001 + DPY012 | DPY002 + DPY048 |
| Y75F           | DPY001 + DPY013 | DPY002 + DPY049 |
| R211A          | DPY001 + DPY014 | DPY002 + DPY050 |
| E220A          | DPY001 + DPY015 | DPY002 + DPY051 |
| E220Q          | DPY001 + DPY016 | DPY002 + DPY052 |
| Q263A          | DPY001 + DPY017 | DPY002 + DPY053 |
| F264A          | DPY001 + DPY018 | DPY002 + DPY054 |
| F264M          | DPY001 + DPY019 | DPY002 + DPY055 |
| Y395A          | DPY001 + DPY020 | DPY002 + DPY056 |
| Y395F          | DPY001 + DPY021 | DPY002 + DPY057 |
| E400A          | DPY001 + DPY022 | DPY002 + DPY058 |
| E400Q          | DPY001 + DPY023 | DPY002 + DPY059 |
| F401A          | DPY001 + DPY024 | DPY002 + DPY060 |
| F401Y          | DPY001 + DPY025 | DPY002 + DPY061 |
| R471A          | DPY001 + DPY026 | DPY002 + DPY062 |
| R471Q          | DPY001 + DPY027 | DPY002 + DPY063 |
| R471K          | DPY001 + DPY028 | DPY002 + DPY064 |
| L472F          | DPY001 + DPY029 | DPY002 + DPY065 |
| K473A          | DPY001 + DPY030 | DPY002 + DPY066 |
| K473R          | DPY001 + DPY032 | DPY002 + DPY068 |
| L474Y          | DPY001 + DPY033 | DPY002 + DPY069 |

|       |                 |                 |
|-------|-----------------|-----------------|
| H577A | DPY001 + DPY034 | DPY002 + DPY070 |
| H577Q | DPY001 + DPY035 | DPY002 + DPY071 |
| H577N | DPY001 + DPY036 | DPY002 + DPY072 |

## Supplementary Note

### Synthesis of Dol25-P-C-Man

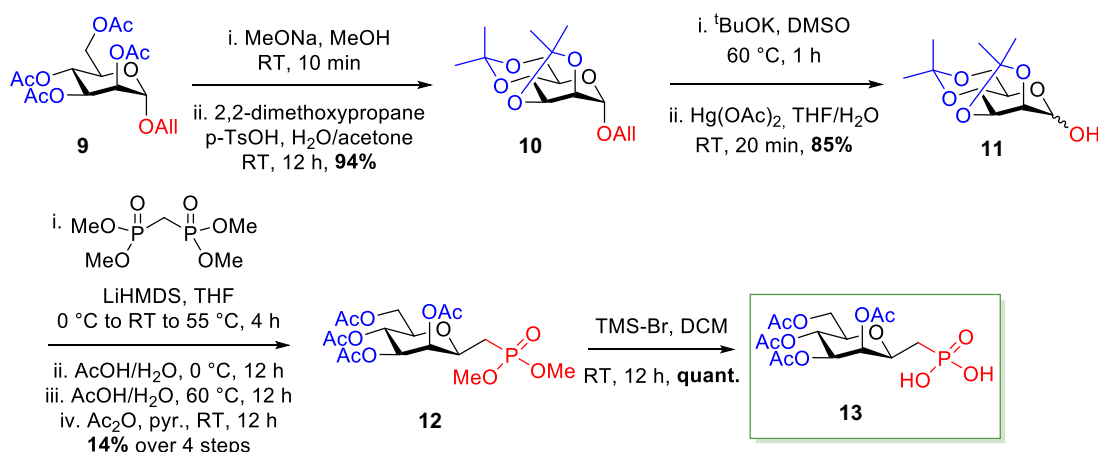

**Scheme 1:** Nine-step synthesis of mannose  $\beta$ -phosphonate **13**

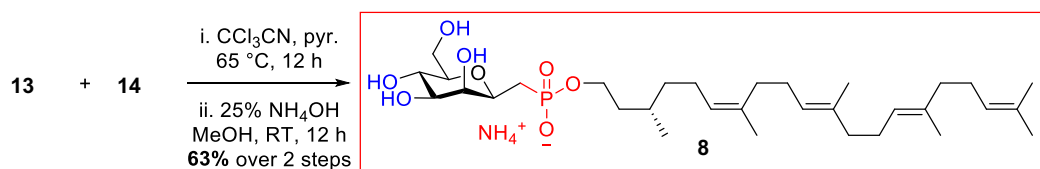

**Scheme 2:** Man-CP-C25-Farnesylcitronellyl **8** phosphonate by trichloroacetonitrile activation of Man  $\beta$ -phosphonate **13** and S<sub>N</sub>2 reaction with lipid alcohol **14**.

$\beta$ -D-Mannosyl phosphonate **13** was synthesized from allyl 2,3,4,6-tetra-O-acetyl- $\alpha$ -D-mannopyranoside **9** in a nine-step sequence based on a previously described method<sup>1</sup>. Notably, installing isopropylidene protecting groups was essential to achieve a high degree of anomeric control during the key Horner-Wadsworth-Emmons (HWE) phosphonate insertion reaction. The  $\alpha$ -anomer was readily separated after cleavage of the less stable 4,6-*O*-isopropylidene protecting group (**Scheme 1**).

Finally, trichloroacetonitrile activation of glycosyl donor **13**, coupling with (*S*)-farnesylcitronellol<sup>2</sup> **14** and global deprotection as previously reported<sup>3</sup> allowed the isolation of Man-CP-C25-Farnesylcitronellyl **8** (**Scheme 2**).

1. Borodkin, V. S.; Ferguson, M. A. J.; Nikolaev, A. V. *Tetrahedron Lett.* **2001**, 42 (31), 5305.
2. Ramírez, A. S.; Boilevin, J.; Biswas, R.; Gan, B. H.; Janser, D.; Aebi, M.; Darbre, T.; Reymond, J. L.; Locher, K. P. *Glycobiology* **2017**, 27 (6), 525.
3. Bloch, J. S.; Pescuillesi, G.; Boilevin, J.; Nosol, K.; Irobalieva, R. N.; Darbre, T.; Aebi, M.; Kossiakov, A. A.; Reymond, J. L.; Locher, K. P. *Nature* **2020**, 579, 443.

**(3aS,4S,5aR,9aR,9bS)-2,2,8,8-tetramethyl-4-(((E)-prop-1-en-1-yl)oxy)hexahydro-[1,3]dioxolo[4',5':4,5]pyrano[3,2-d][1,3]dioxine 10**

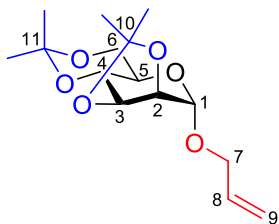

**9** (4.50 g, 11.59 mmol, 1.00 eq) was dissolved in 25 mL MeOH and sodium methoxide (2.65 mL, 11.59 mmol, 1.00 eq, 25 wt% in MeOH) was added. The reaction mixture was sonicated at RT for 10 min, neutralized with Amberlyst IR-15 ion exchange resin and concentrated to dryness. The residue was dissolved in 40 mL dry acetone followed by the addition of 2,2-dimethoxypropane (11.40 mL, 92.70 mmol, 10.00 eq) and *p*-toluenesulfonic acid monohydrate (441 mg, 2.32 mmol, 0.20 eq) under an Ar atmosphere at RT. The reaction mixture was stirred overnight, diluted in EtOAc, washed with saturated NaHCO<sub>3</sub>, brine, dried over Na<sub>2</sub>SO<sub>4</sub>, filtered and concentrated *in vacuo*. The residue was purified by flash column chromatography on silica gel (DCM to DCM/MeOH 99:1, R<sub>f</sub> = 0.11 in DCM) to yield **2** (3.26 g, 10.85 mmol, 94%) as a colorless oil. <sup>1</sup>H NMR (400 MHz, CDCl<sub>3</sub>) δ = 5.84-5.94 (m, 1H, H-8), 5.29 (dd, *J* = 17.2 Hz, 1.6 Hz, 1H, H-9a), 5.22 (dd, *J* = 10.4 Hz, 1.2 Hz, 1H, H-9b), 5.06 (s, 1H, H-1), 4.14-4.20 (m, 3H, H-7a, H-2, H-3), 3.96-4.01 (m, 1H, H-7b), 3.85-3.89 (m, 1H, H-6a), 3.72-3.78 (m, 2H, H-6b, H-4), 3.57-3.63 (m, 1H, H-5), 1.54, 1.51, 1.42, 1.35 (4xs, 4x3H, 4xMe). <sup>13</sup>C NMR (101 MHz, CDCl<sub>3</sub>) δ = 133.6 (s, C-8), 118.1 (s, C-9), 109.6 (s, C-10), 99.8 (s, C-11), 97.1 (s, C-1), 76.3 (s, C-2), 75.0 (s, C-3), 72.9 (s, C-4), 68.3 (s, C-7), 62.2 (s, C-6), 61.5 (s, C-5), 29.2, 28.3, 26.3, 18.9 (4xs, 4xMe). ESI-MS (+) *m/z* calculated 301.16 (M+[H<sup>+</sup>]), found 301.17 for C<sub>15</sub>H<sub>25</sub>O<sub>6</sub><sup>+</sup>.

**(3aS,5aR,9aR,9bS)-2,2,8,8-tetramethylhexahydro-[1,3]dioxolo[4',5':4,5]pyrano[3,2-d][1,3]dioxin-4-ol 11**

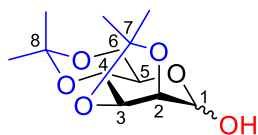

To a solution of **10** (610 mg, 2.03 mmol, 1.00 eq) in 5.5 mL DMSO was added potassium *tert*-butylate (912 mg, 8.12 mmol, 4.00 eq) at RT under an Ar atmosphere. The reaction mixture was then stirred for 1 h at 60 °C and quenched by addition of water. The aqueous phase was extracted 4 times with EtOAc and the combined organic layers were washed once with water, dried over Na<sub>2</sub>SO<sub>4</sub>, filtered and concentrated to dryness. The residue was dissolved in 11 mL of a mixture of THF/H<sub>2</sub>O 9:1 and Hg(OAc)<sub>2</sub> (1.29 g, 4.06 mmol, 2.00 eq) was added portionwise. The reaction mixture was stirred for 20 min at RT, filtered on celite and concentrated. The residue was dissolved in EtOAc, washed with water and brine, dried over Na<sub>2</sub>SO<sub>4</sub>, filtered and concentrated to dryness to yield **11** (450 mg, 1.73 mmol, 85%) as a colorless solid as an alpha/beta mixture which was used in the next step without further purification. <sup>1</sup>H NMR alpha product (400 MHz, CDCl<sub>3</sub>) δ = 5.44 (d, *J* = 3.3 Hz, 4.17-4.23 (m, 2H, H-2, H-3), 3.86-3.89 (m, 1H, H-6a), 3.74-3.83 (m, 3H, H-4, H-5, H-6b), 2.57 (d, *J* = 3.3 Hz, 1H, OH), 1.55, 1.52, 1.43, 1.36 (4xs, 4x3H, 4xMe). <sup>13</sup>C NMR (101 MHz, CDCl<sub>3</sub>) δ = 109.7 (s, C-7), 99.9 (s, C-8), 93.1 (s, C-1), 76.3 (s, C-2), 74.9 (s, C-3), 72.8 (s, C-4), 62.3 (s, C-6), 61.9 (s, C-5), 29.2, 28.3, 26.3, 19.0 (4xs, 4xMe). ESI-MS (+) *m/z* calculated 261.13 (M+[H<sup>+</sup>]), found 261.13 for C<sub>12</sub>H<sub>21</sub>O<sub>6</sub><sup>+</sup>.



**(2R,3R,4S,5S,6R)-2-(acetoxymethyl)-6-((dimethoxyphosphoryl)methyl)tetrahydro-2H-pyran-3,4,5-triyl triacetate **11****

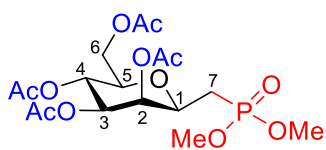

**11** (440 mg, 1.69 mmol, 1.00 eq) was added dropwise to a mixture of bis(dimethoxyphosphoryl)methane (432 mg, 1.90 mmol, 1.10 eq) and LiHMDS (1.86 mL, 1.86 mmol, 1.10 eq, 1 M in THF) in 5 mL THF at 0 °C under an Ar atmosphere. The reaction mixture was warmed up to RT over 1 h and heated up to 55 °C for another hour. The reaction mixture was then diluted with EtOAc, washed with saturated NaHCO<sub>3</sub> and brine, dried over Na<sub>2</sub>SO<sub>4</sub>, filtered and concentrated *in vacuo*. The residue was dissolved in 4 mL of a mixture of AcOH/H<sub>2</sub>O 4:1 at 0 °C and the reaction mixture was stirred at this temperature overnight, concentrated to dryness and the two anomers were separated by flash column chromatography on silica gel (EtOAc to DCM/MeOH 98:2 to 97:3). The beta anomer was dissolved in 4 mL of a mixture of AcOH/H<sub>2</sub>O 4:1 at RT and the reaction mixture was stirred at 65 °C for 2 h and concentrated to dryness. The residue was dissolved in 4 mL of a mixture of Ac<sub>2</sub>O/pyridine 1:1, stirred at RT overnight and concentrated to dryness. The residue was purified by flash column chromatography on silica gel (DCM/MeOH 98:2 to 96:4, R<sub>f</sub> = 0.20 in DCM/MeOH 98:2) to yield **12** (110 mg, 0.24 mmol, 14%) as a colorless foam. <sup>1</sup>H NMR (400 MHz, CDCl<sub>3</sub>) δ = 5.34 (dd, *J* = 3.2 Hz, 0.8 Hz, 1H, H-2), 5.19 (t, *J* = 10.0 Hz, 1H, H-4), 5.06 (dd, *J* = 10.0 Hz, 3.2 Hz, 1H, H-3), 4.21 (dd, *J* = 12.4 Hz, 2.4 Hz, 1H, H-6a), 4.12 (dd, *J* = 12.4 Hz, 2.4 Hz, 1H, H-6b), 4.04-4.09 (m, 1H, H-1), 3.74 (d, *J* = 8.0 Hz, 3H, OMe), 3.72 (d, *J* = 8.0 Hz, 3H, OMe), 3.68-3.80 (m, 1H, H-5), 2.17, 2.08, 2.04, 1.97 (4xs, 4x3H, 4xOAc), 2.05-2.14 (m, 2H, H-7). <sup>13</sup>C NMR (101 MHz, CDCl<sub>3</sub>) δ = 170.7, 170.4, 170.1, 169.8 (4xs, 4×OC=O), 76.6 (s, C-5), 72.5 (d, *J* = 1.3 Hz, C-1), 72.2 (d, *J* = 1.2 Hz, C-3), 70.1 (d, *J* = 10.4 Hz, C-2), 65.9 (s, C-4), 62.9 (s, C-6), 53.0 (d, *J* = 6.7 Hz, OMe), 52.4 (d, *J* = 6.7 Hz, OMe), 27.5 (d, *J* = 144.8 Hz, C-7), 20.9, 20.8, 20.8, 20.7 (4xs, 4xOC=OCH<sub>3</sub>). <sup>31</sup>P NMR (122 MHz, CDCl<sub>3</sub>) δ = 29.1. ESI-MS (+) *m/z* calculated 455.13 (M+[H<sup>+</sup>]), found 455.13 for C<sub>17</sub>H<sub>28</sub>O<sub>12</sub>P<sup>+</sup>.

**(((2R,3S,4S,5R,6R)-3,4,5-triacetoxy-6-(acetoxymethyl)tetrahydro-2H-pyran-2-yl)methyl)phosphonic acid **13****

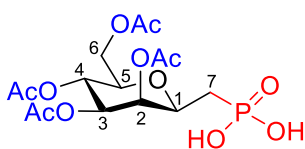

**12** (96 mg, 0.21 mmol, 1.00 eq) was dissolved in 2 mL dry DCM and TMSBr (0.56 mL, 4.23 mmol, 20.00 eq) was added dropwise at 0 °C under an Ar atmosphere. The reaction mixture was then stirred at RT for 12 h, concentrated *in vacuo*, dissolved in 9 mL acetone and 0.60 mL H<sub>2</sub>O was added. The reaction mixture was stirred at RT for 30 min and then concentrated to dryness to yield **13** (90 mg, 0.21 mmol, quant.) as a colorless solid which was used in the next step without further purification.

**(2R,3R,4S,5S,6R)-2-(acetoxymethyl)-6-((hydroxy(((S,6Z,10E,14E)-3,7,11,15,19-pentamethylcosa-6,10,14,18-tetraen-1-yl)oxy)phosphoryl)methyl)tetrahydro-2H-pyran-3,4,5-triyl triacetate**

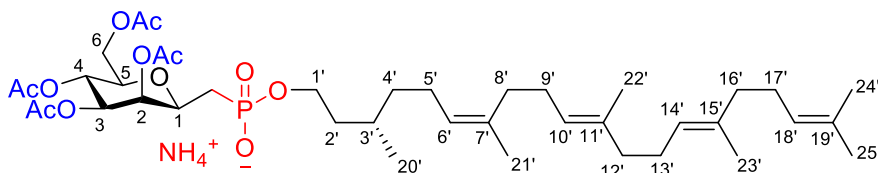

**13** (90 mg, 0.21 mmol, 1.00 eq) and **14** (305 mg, 0.84 mmol, 4.00 eq) were dissolved in 4 mL pyridine and trichloroacetonitrile (0.21 mL, 2.11

mmol, 10.00 eq) was added at RT under an Ar atmosphere. The reaction mixture was warmed up to 65 °C, stirred overnight and concentrated to dryness. The residue was purified by flash column chromatography on silica gel basified with ammonium hydroxide 25% solution in water (EtOAc/MeOH 8:2 to 7:3, R<sub>f</sub> = 0.28 in EtOAc/MeOH 7:3) to yield **the acetylated Man-CP-(S)-Farnesylcitronellyl** (105 mg, 0.13 mmol, 63%) as a colorless sticky solid. <sup>1</sup>H NMR (400 MHz, MeOD) δ = 5.44 (d, *J* = 2.4 Hz, 1H, H-2), 5.09-5.20 (m, 6H, H-2, H-3, H-6', H-10', H-14', H-18'), 4.25 (dd, *J* = 12.4 Hz, 1.2 Hz, 1H, H-6a), 4.07-4.11 (m, 2H, H-1, H-6b), 3.92-3.97 (m, 2H, H-1'), 3.76-3.80 (m, 1H, H-5), 2.16 (s, 3H, OAc), 1.95-2.12 (m, 22H, H-7, 2xOAc, H-5', H-8', H-9', H-12', H-13', H-16', H-17'), 1.93 (s, 3H, OAc), 1.67-1.68 (m, 7H, H-2'a, H-21', H-22'), 1.60-1.62 (m, 10H, H-3', H-23', H-24', H-25'), 1.33-1.46 (m, 2H, H-2'b, H-4'a), 1.16-1.19 (m, 1H, H-4'b), 0.92 (d, *J* = 6.4 Hz, 3H, H-20'). <sup>13</sup>C NMR (101 MHz, MeOD) δ = 172.4, 172.0, 171.6, 171.4 (4xs, 4xOC=O), 136.0 (s, C-7'), 135.9 (s, C-11'), 135.9 (s, C-15'), 132.0 (s, C-19'), 126.6 (s, C-18'), 125.5 (s, C-14'), 125.5 (s, C-10'), 125.5 (s, C-6'), 77.3 (s, C-5), 74.5 (s, C-1), 73.9 (s, C-3), 71.8 (d, *J* = 7.9 Hz, C-2), 67.2 (s, C-4), 64.1 (d, *J* = 6.3 Hz, C-1'), 63.9 (s, C-6), 40.9 (s, C-8'), 40.8 (s, C-12'), 38.9 (s, C-2'), 38.8 (s, C-9'), 38.6 (s, C-4'), 32.9 (s, C-13'), 30.4 (s, C-3'), 28.3 (d, *J* = 148.9 Hz, C-7), 27.6 (s, C-16'), 27.6 (s, C-5'), 26.4 (s, C-17'), 25.9 (s, C-21'), 23.7 (s, C-22'), 20.7, 20.7, 20.6, 20.6 (4xs, 4xOC=OCH<sub>3</sub>), 19.8 (s, C-20'), 17.8 (s, C-23'), 16.2 (s, C-24'), 16.1 (s, C-25'). <sup>31</sup>P NMR (122 MHz, CDCl<sub>3</sub>) δ = 22.4. ESI-HRMS (-) *m/z* calculated 767.4141 (M-[H<sup>+</sup>]), found 767.4166 for C<sub>40</sub>H<sub>64</sub>O<sub>12</sub>P<sup>-</sup>.

**(S,6Z,10E,14E)-3,7,11,15,19-pentamethylcosa-6,10,14,18-tetraen-1-yl (((2R,3S,4S,5S,6R)-3,4,5-trihydroxy-6-(hydroxymethyl)tetrahydro-2H-pyran-2-yl)methyl)phosphonate 8**

**The acetylated Man-CP-(S)-Farnesylcitronellyl** (51 mg, 0.08 mmol, 1.00 eq) was dissolved in 5 mL MeOH and an excess of a 25% ammonium hydroxide solution in water was added dropwise (200 eq per function). The reaction mixture was stirred at RT for 12 h. MeOH was removed *in vacuo* and acetamide and ammonium hydroxide were removed at the freeze-dryer to yield **8** (75.50 mg, 0.12 mmol, quant.) as a colorless lyophilisat

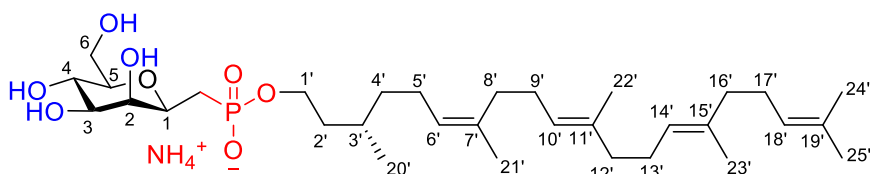

( $R_f = 0.50$ , EtOAc/MeOH 4:6).  $^1\text{H}$  NMR (400 MHz, MeOD)  $\delta = 5.08\text{-}5.14$  (m, 4H, H-6', H-10', H-14', H-18'), 3.85-3.94 (m, 3H, H-2, H-1'), 3.78-

3.82 (m, 2H, H-1, H-6a), 3.66 (dd,  $J = 12.0$  Hz, 6.0 Hz, 1H, H-6b), 3.45-3.54 (m, 2H, H-3, H-4), 3.20-3.23 (m, 1H, H-5), 1.94-2.12 (m, 16H, H-7, H-5', H-8', H-9', H-12', H-13', H-16', H-17'), 1.67-1.71 (m, 7H, H-2'a, H-21', H-22'), 1.60-1.62 (m, 10H, H-3', H-23', H-24', H-25'), 1.33-1.45 (m, 2H, H-2'b, H-4'a), 1.16-1.20 (m, 1H, H-4'b), 0.92 (d,  $J = 6.8$  Hz, 3H, H-20').  $^{13}\text{C}$  NMR (101 MHz, MeOD)  $\delta = 136.0$  (s, C-7'), 135.9 (s, C-11'), 135.9 (s, C-15'), 132.0 (s, C-19'), 126.6 (s, C-18'), 125.5 (s, C-14'), 125.5 (s, C-10'), 125.5 (s, C-6'), 82.1 (s, C-5), 76.5 (s, C-3), 76.3 (s, C-1), 72.9 (d,  $J = 6.6$  Hz, C-2), 68.8 (s, C-4), 63.4 (d,  $J = 5.9$  Hz, C-1'), 63.1 (s, C-6), 40.9 (s, C-8'), 40.8 (s, C-12'), 39.3 (s, C-2'), 39.2 (s, C-9'), 38.8 (s, C-4'), 32.9 (s, C-13'), 30.6 (s, C-3'), 30.4 (d,  $J = 135.6$  Hz, C-7), 27.8 (s, C-16'), 27.6 (s, C-5'), 26.4 (s, C-17'), 25.9 (s, C-21'), 23.7 (s, C-22'), 19.8 (s, C-20'), 17.8 (s, C-23'), 16.1 (s, C-24'), 16.1 (s, C-25').  $^{31}\text{P}$  NMR (122 MHz,  $\text{CDCl}_3$ )  $\delta = 21.4$ . ESI-HRMS (-)  $m/z$  calculated 599.3718 ( $\text{M} - [\text{H}^+]$ ), found 599.3739 for  $\text{C}_{32}\text{H}_{56}\text{O}_8\text{P}^-$ .

### LC-MS analysis of glycopeptides.

2  $\mu\text{L}$  of samples were analyzed on a calibrated Q-Exactive mass spectrometer (Thermo Fischer Scientific) coupled to a nano-Acquity UPLC system (Waters). Peptides were resuspended in 2.5% acetonitrile with 0.1% formic acid and loaded onto a Acclaim PepMap 100 trap column (75  $\mu\text{m} \times 20$  mm, 100  $\text{\AA}$ , 3  $\mu\text{m}$  particle size) and separated on a nanoACQUITY UPLC BEH130 C18 column (75  $\mu\text{m} \times 250$  mm, 130  $\text{\AA}$ , 1.7  $\mu\text{m}$  particle size), at a constant flow rate of 300  $\text{nL min}^{-1}$ , with a column temperature of 50  $^\circ\text{C}$  and a linear gradient of 2–60% acetonitrile/0.1% formic acid in 20 min, and then 60-98% acetonitrile/0.1% formic acid in 5 min, and then held isocratically for another 5 min. For mass spectrometer, it was operated under data-dependent acquisition (DDA), one scan cycle comprised of a full scan MS survey spectrum, followed by up to 12 sequential HCD MS/MS on the most intense signals above a threshold of  $1\text{e}4$ . Full-scan MS spectra (600–2000  $m/z$ ) were acquired in the FT-Orbitrap at a resolution of 70,000 at 400  $m/z$ , while HCD MS/MS spectra were recorded in the FT-Orbitrap at a resolution of 35,000 at 400  $m/z$ . HCD was performed with a target value of  $1\text{e}5$  and normalization collision energy 25 was applied. AGC target values were  $5\text{e}5$  for full FTMS. For all experiments, dynamic exclusion was used with a single repeat count, 15 s repeat duration, and 30 s exclusion duration. There was one clean run between samples.



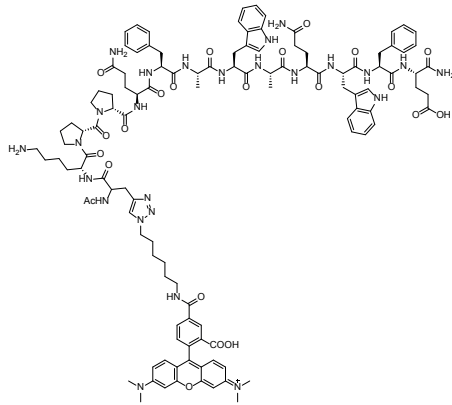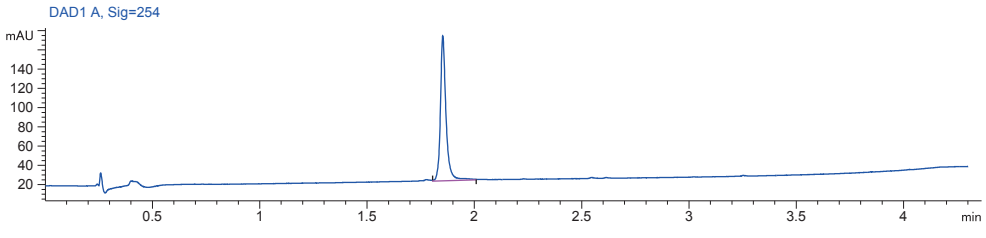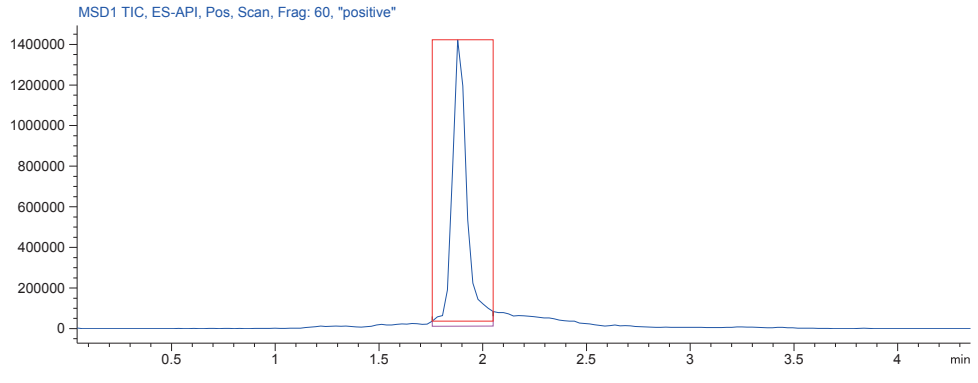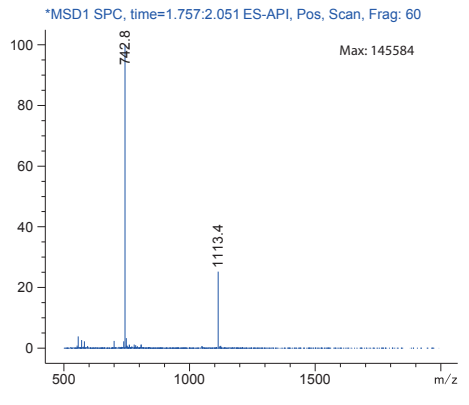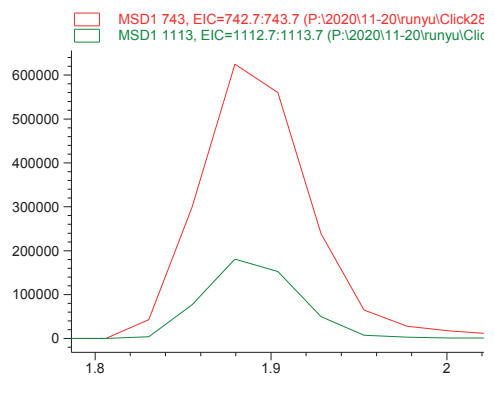

**Structure and LC-MS QC data for the synthetic peptide WEHI-1881197.**

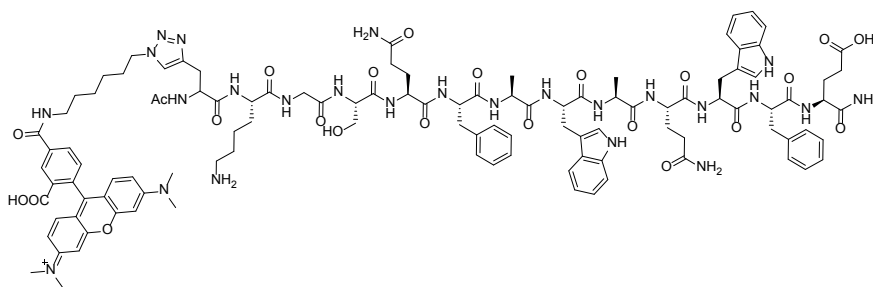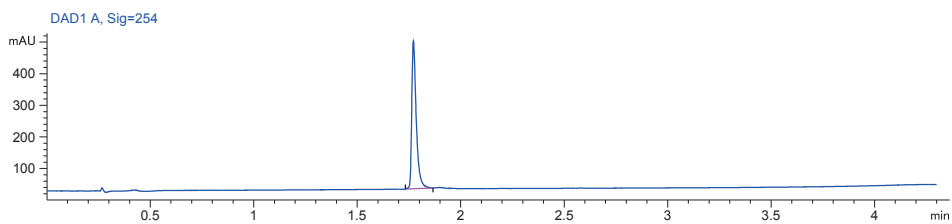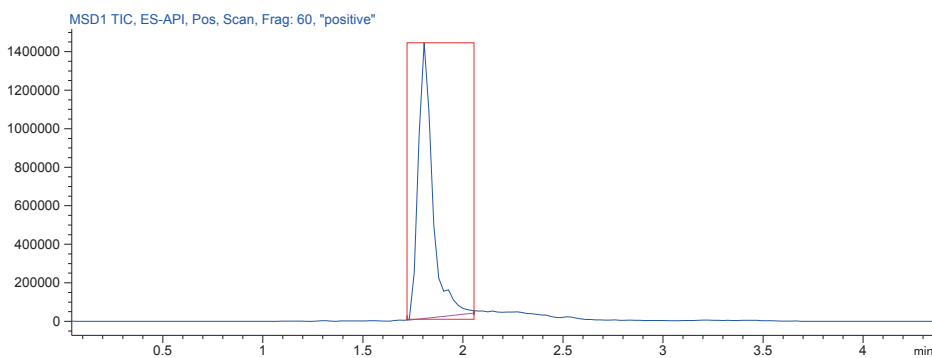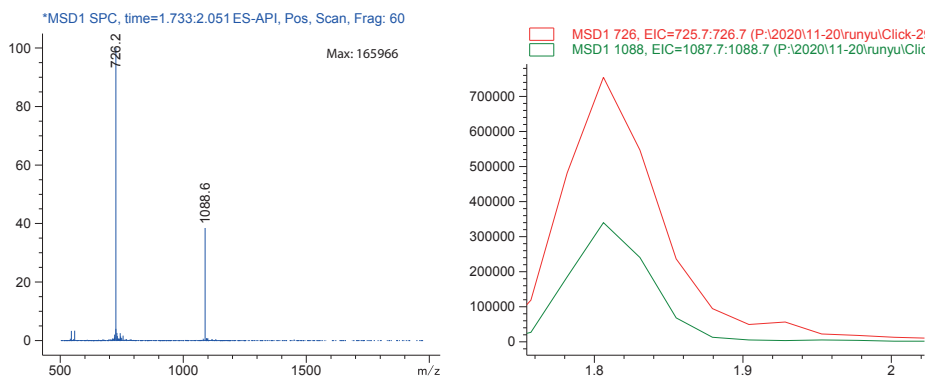

Structure and LC-MS QC data for the synthetic peptide WEHI-1881198.

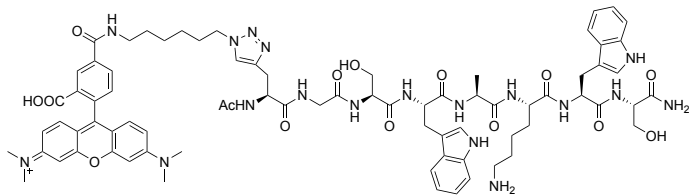

Ac-Ppg(TAMRA)-Gly-Ser-Trp-Ala-Lys-Trp-Ser-NH<sub>2</sub>  
WEHI-1886494

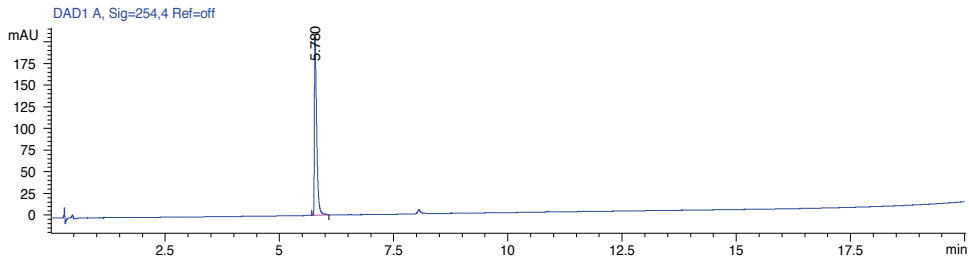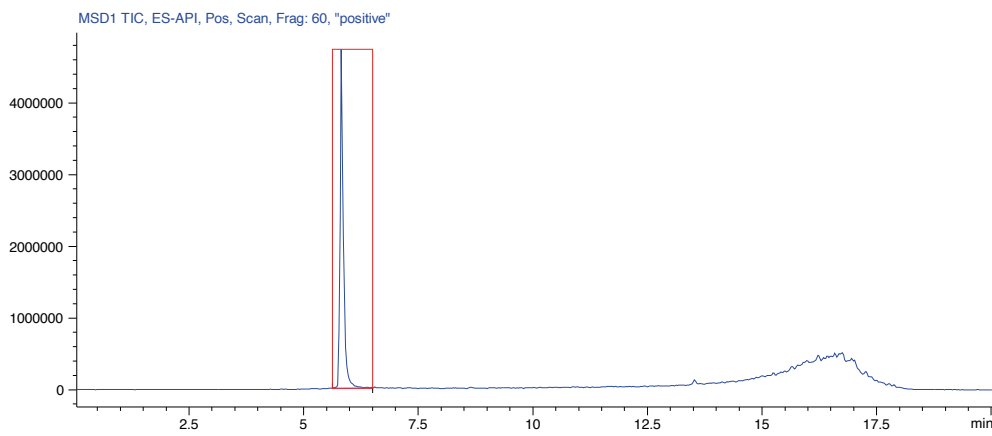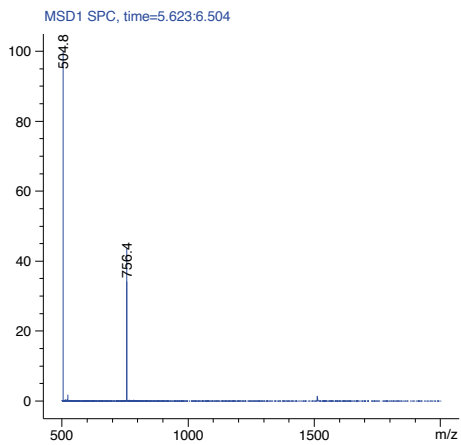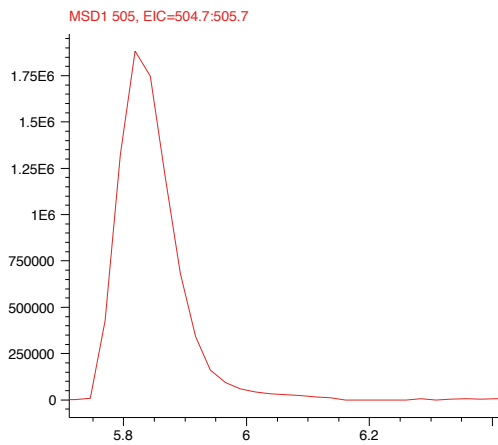

Structure and LC-MS QC data for the synthetic peptide WEHI-1886494.

RT: 4.95 - 39.92

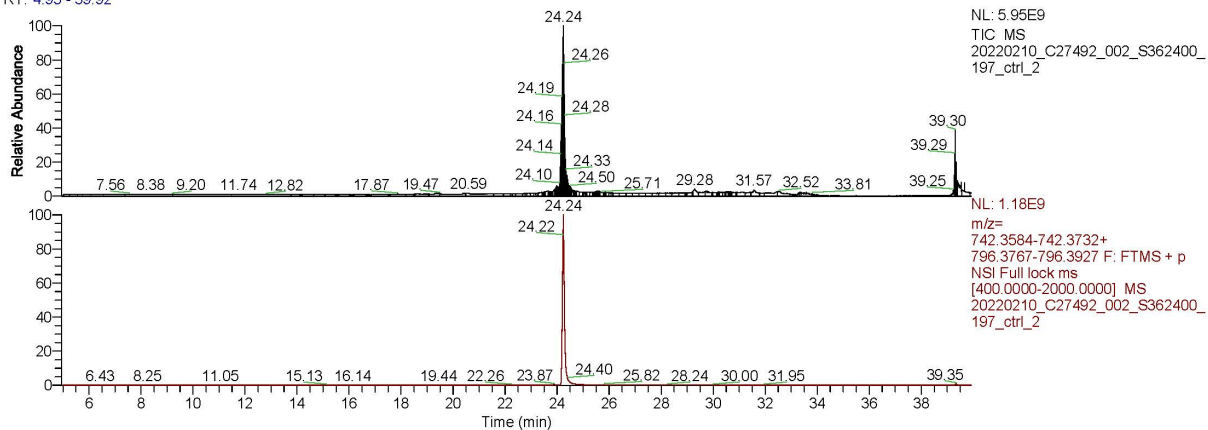20220210\_C27492\_002\_S362400\_197\_ctrl\_2 #3342-3459 RT: 24.12-24.61 AV: 74 NL: 2.71E8  
T: FTMS + p NSI Full lock ms [400.0000-2000.0000]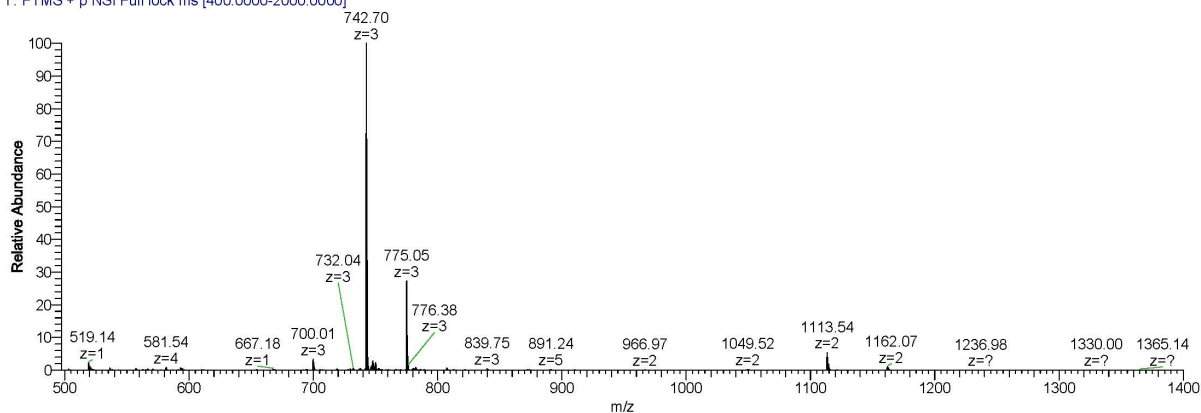

LC-MS data for glycopeptides from *CeDPY19* *in vitro* activity assays: WEHI-1881197 control.



RT: 4.95 - 39.92

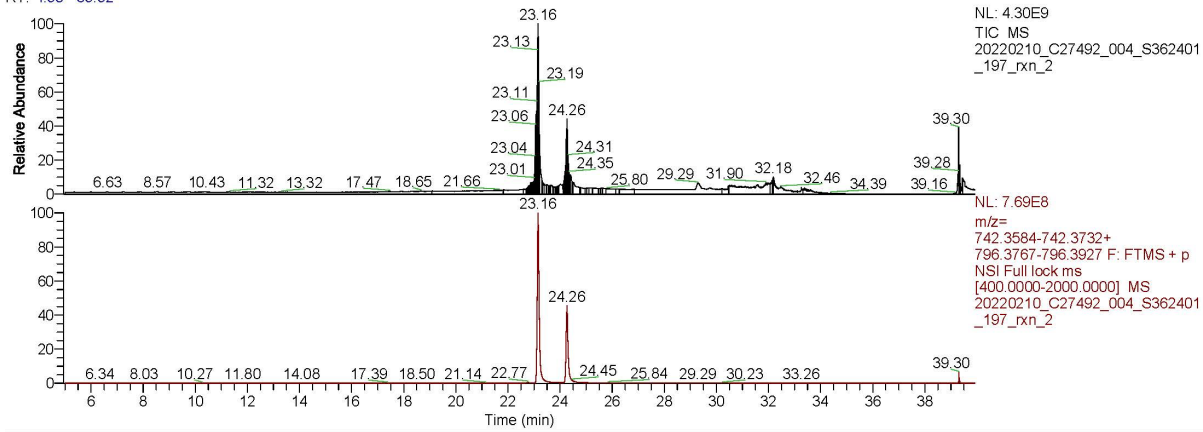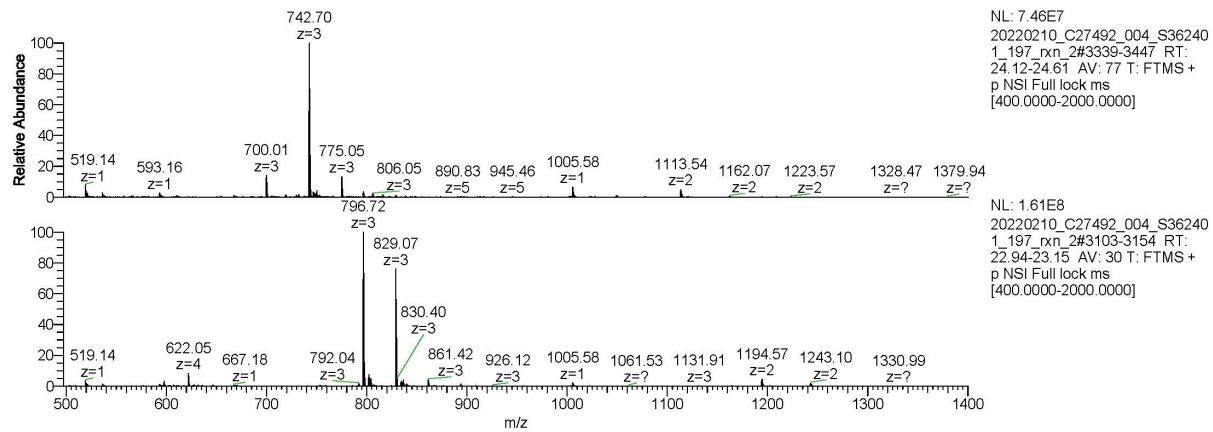

LC-MS data for glycopeptides from *CeDPY19 in vitro* activity assays: WEHI-1881197 *CeDPY19* reaction.

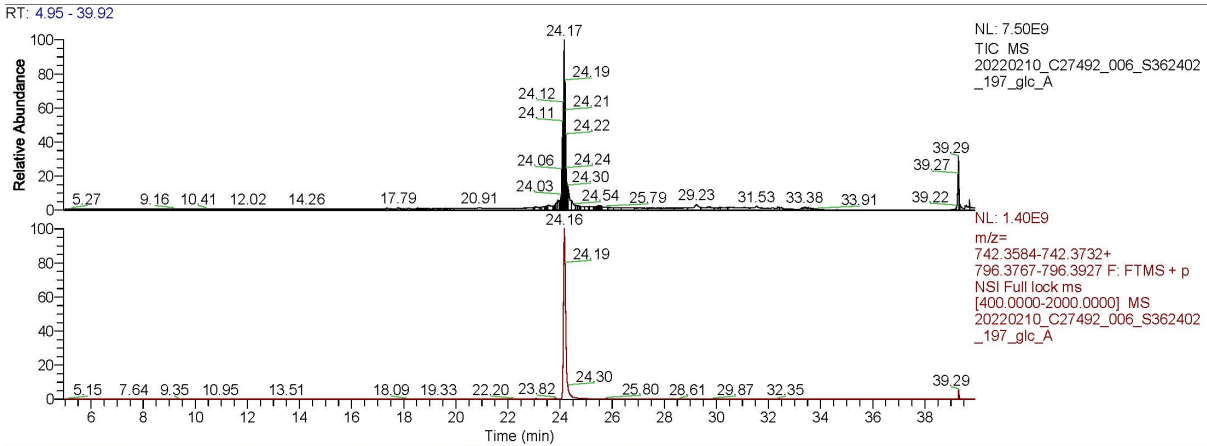

20220210\_C27492\_006\_S362402\_197\_glc\_A #3380-3485 RT: 24.11-24.60 AV: 81 NL: 3.01E8  
T: FTMS + p NSI Full lock ms [400.0000-2000.0000]

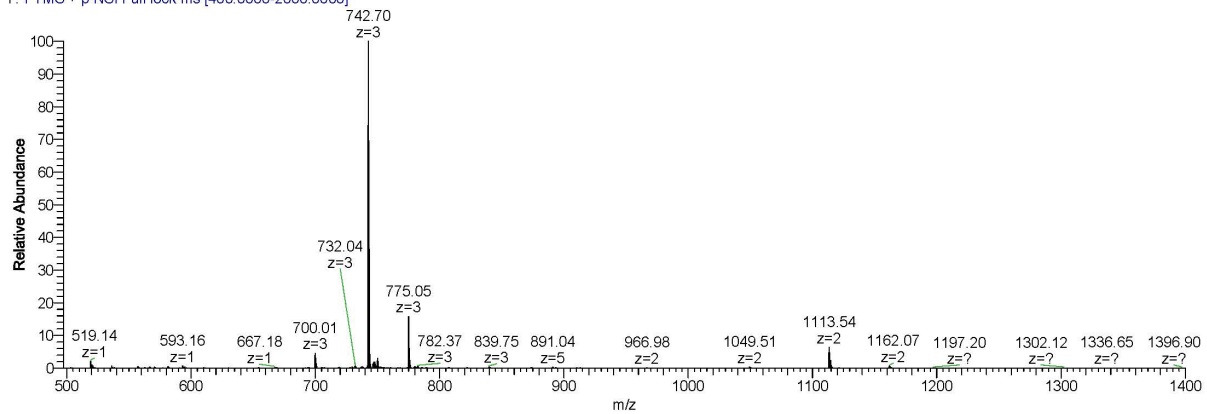

**LC-MS data for glycopeptides from *CeDPY19* *in vitro* activity assays: WEHI-1881197 *CeDPY19* reaction with Dol25-P-Glc.**

RT: 4.95 - 39.92

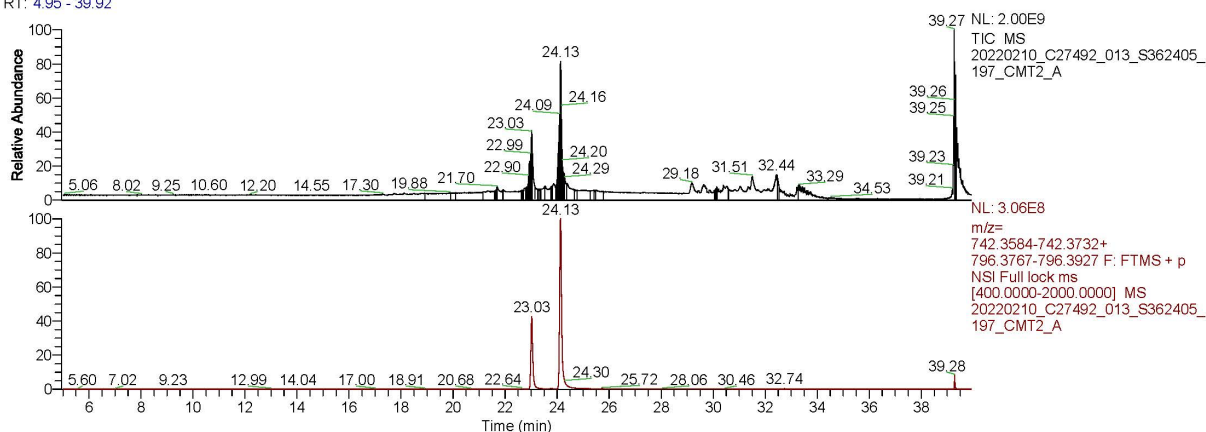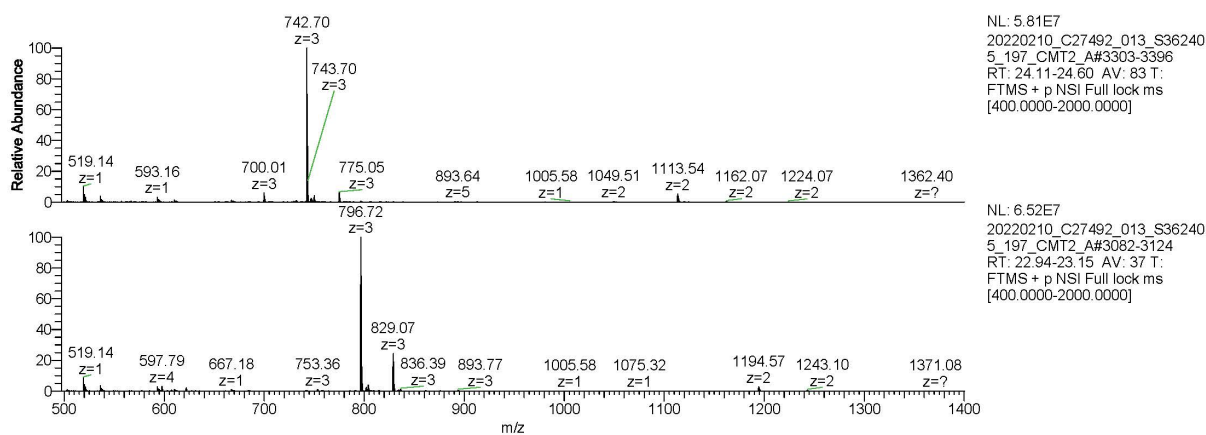

**LC-MS data for glycopeptides from *CeDPY19* *in vitro* activity assays: WEHI-1881197 *CeDPY19* reaction in presence of CMT2-Fab.**

RT: 4.95 - 39.92

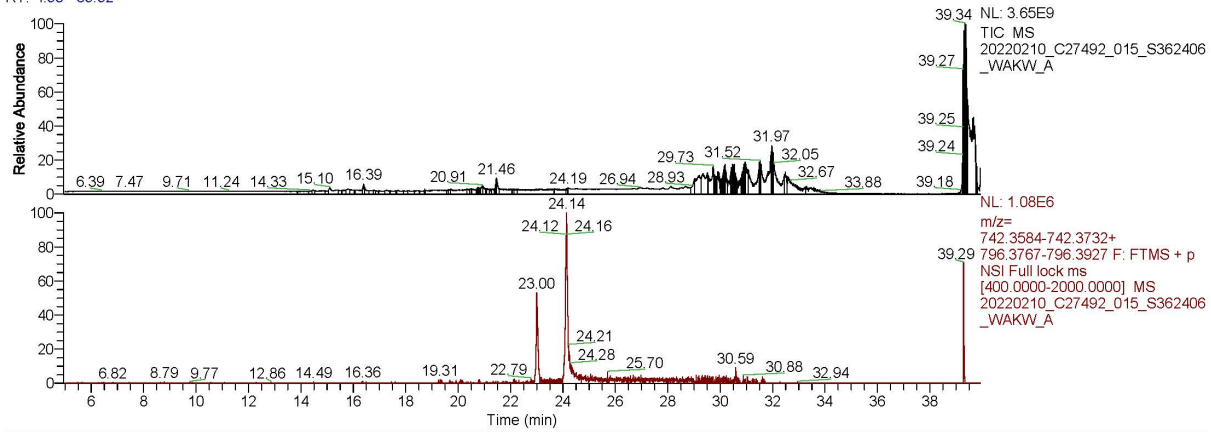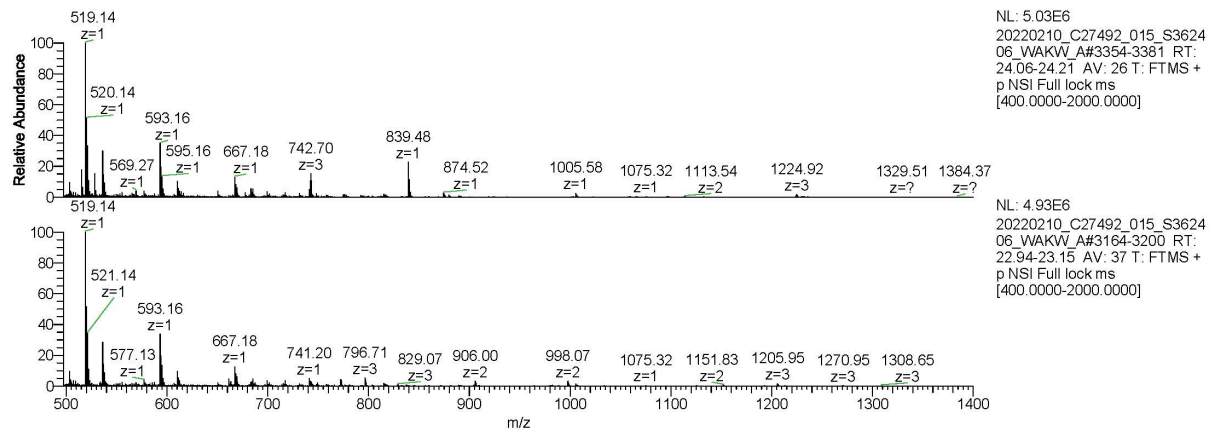

**LC-MS data for glycopeptides from *CeDPY19* *in vitro* activity assays: TAMRA-Ac-Pra-GSWAKWS-NH<sub>2</sub> *CeDPY19* reaction.**

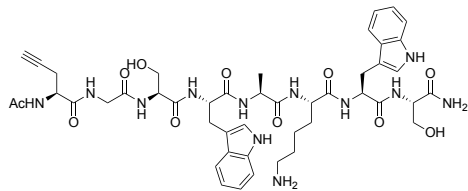

Ac-Ppg-Gly-Ser-Trp-Ala-Lys-Trp-Ser-NH<sub>2</sub>  
WEHI-1886493

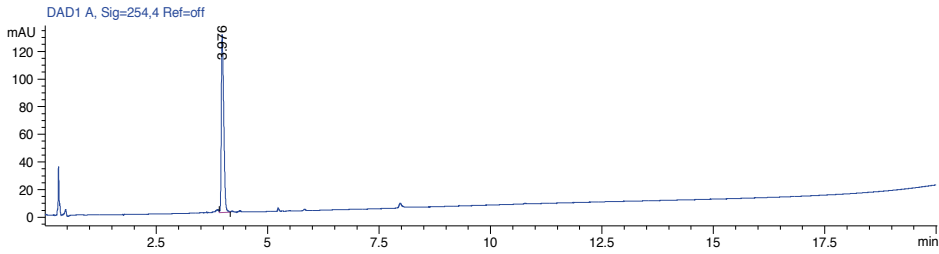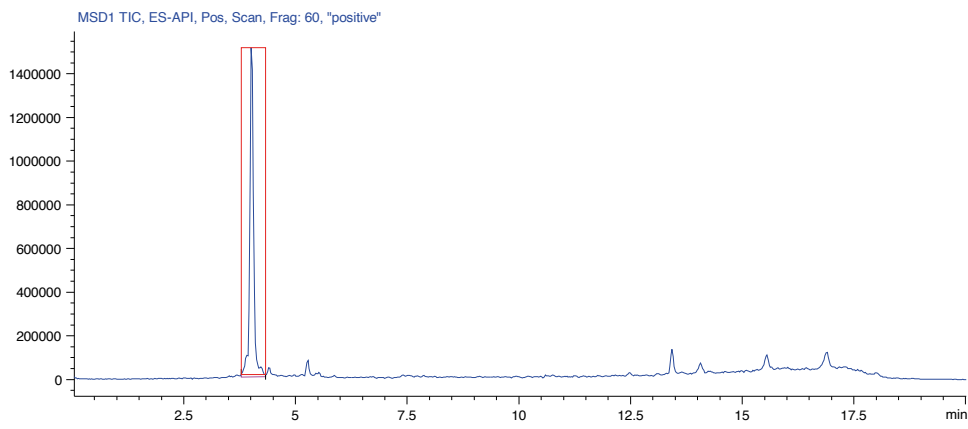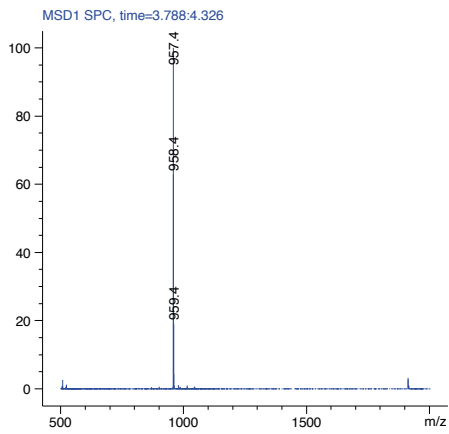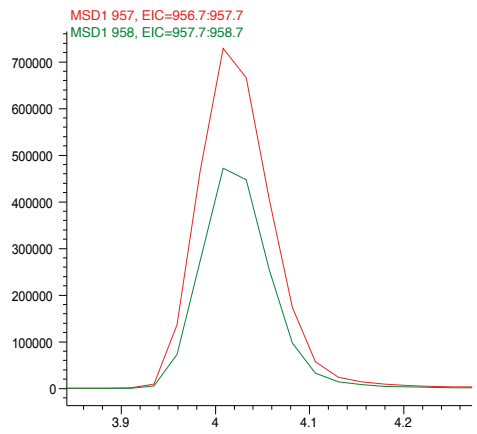

**Structure and LC-MS QC data for the synthetic peptide WEHI-1886493.**

**Source Data for Supplementary Figure 2: Raw and uncropped Western blots.**

E579A-Q

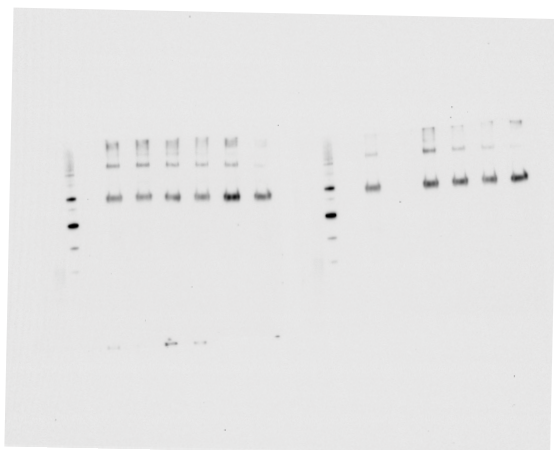

F401Y, R471A,Q, L472F, K473

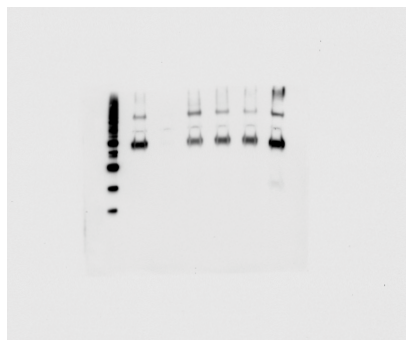

R69AK, E71AQDLM, Y75F, R211A, E220AQ, Q263A

K473R,F, L474Y, H577A,Q,N

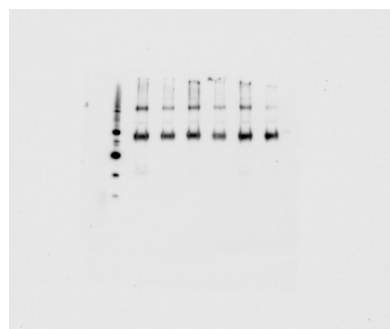

Y75A, F264A,M, E400A,Q, F401A

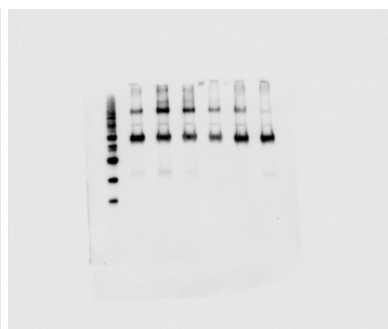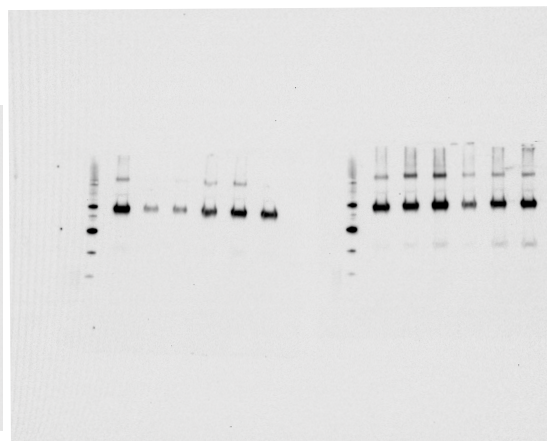

Supplement: 41589_2022_1219_MOESM1_ESM.pdf [file 41589_2022_1219_MOESM1_ESM.pdf]
